# Supplementary material for: CHEMICAL PROTECTION OF ANIMALS FROM THE EFFECT OF X RAYS
Source: MDPI journal article supplement (doi:10.3390/insects15010071), 1958-09-01
Supplement: s1 [file s1]

Table 2. List of firefly citizen science and monitoring projects, presented in chronological order of establishment and displaying types of data collected and taxonomic and geographic scope. Single asterisk (\*) indicates that some species-level occurrence records may be generated, but it is not a primary goal of the project. Double asterisks (\*\*) indicate that count data are collected but effort metrics are not.

| Project                                          | Type of data generated     |         |          |           | Scope                               |                                                              |
|--------------------------------------------------|----------------------------|---------|----------|-----------|-------------------------------------|--------------------------------------------------------------|
|                                                  | Species occurrence records | Spatial | Temporal | Abundance | Geographic scope                    | Taxonomic scope                                              |
| UK Glow-worm Survey [1]                          | Yes                        | Yes     | Yes      | Yes       | United Kingdom                      | <i>Lampyris noctiluca</i> and other glow-worm spp.           |
| Natuurpunt Glow-worm workgroup [2]               | Yes                        | Yes     | Yes      | Yes**     | Belgium                             | Glow-worm Lampyridae                                         |
| Satoyama Firefly Monitoring [3]                  | Yes                        | Yes     | Yes      | Yes       | Satochi-Satoyama agroscape of Japan | <i>Nipponluciola cruciata</i> ;<br><i>Aquatica lateralis</i> |
| Glow Up! [4]                                     | Yes                        | Yes     | No       | No        | Turin, Italy                        | <i>Luciola italica</i>                                       |
| Firefly Watch [5]                                | No                         | Yes     | Yes      | Yes       | North America                       | Adult flashing Lampyridae                                    |
| Has Visto Una Luciernaga? [6]                    | Yes*                       | Yes     | Yes      | Yes**     | Spain                               | Lampyridae                                                   |
| Fireflyers International iNaturalist Project [7] | Yes                        | Yes     | Yes      | No        | Global                              | Lampyridae and other bioluminescent Coleoptera               |

|                                                               |      |     |      |       |                     |                                 |
|---------------------------------------------------------------|------|-----|------|-------|---------------------|---------------------------------|
| <b>Clemson Disappearing Firefly Project [8]</b>               | No   | Yes | Yes  | No    | South Carolina, USA | Adult flashing Lampyridae       |
| <b>Western Firefly Project [9]</b>                            | Yes* | Yes | Yes  | Yes** | Western USA         | Adult flashing Lampyridae       |
| <b>Observatoire des Vers Luisants &amp; des Lucioles [10]</b> | No   | Yes | Yes* | No    | France              | Lampyridae                      |
| <b>Kreso Krijesnica [11]</b>                                  | Yes* | Yes | Yes  | Yes** | Croatia             | Lampyridae                      |
| <b>Light Up West Virginia [12]</b>                            | Yes  | Yes | Yes  | No    | West Virginia, USA  | Adult flashing Lampyridae       |
| <b>Grup Cucadellum [13]</b>                                   | Yes* | Yes | Yes  | Yes   | Catalonia, Spain    | Lampyridae                      |
| <b>Have you seen a firefly?<br/>(ראיתם גחלילית?) [14]</b>     | Yes  | Yes | Yes  | No    | Israel              | Lampyridae                      |
| <b>Hong Kong Firefly Survey Team [15]</b>                     | Yes  | Yes | Yes  | Yes   | Hong Kong, China    | Lampyridae and Rhagophthalmidae |

|                                                                   |      |         |         |         |                                          |                                                           |
|-------------------------------------------------------------------|------|---------|---------|---------|------------------------------------------|-----------------------------------------------------------|
| <b>Atlanta Firefly Project [16]</b>                               | Yes* | Yes     | Yes     | Yes     | Georgia, USA                             | <i>Photinus pyralis</i> + other adult flashing Lampyridae |
| <b>World Firefly Day Count [17]</b>                               | No   | Yes     | Yes     | Yes**   | India                                    | Adult flashing Lampyridae                                 |
| <b>Magical Mysteries at Bukit Kiara [18]</b>                      | Yes  | Unknown | Unknown | Unknown | Bukit Kiara Park, Kuala Lumpur, Malaysia | Lampyridae and Rhagophthalmidae                           |
| <b>Fireflies of Australia [19]</b>                                | Yes  | Yes     | Yes     | No      | Australia                                | Luciolinae                                                |
| <b>Firefly Atlas [20]</b>                                         | Yes  | Yes     | Yes     | Yes     | USA and Canada                           | Lampyridae                                                |
| <b>Constructing a Colorado Firefly Flash Pattern Dataset [21]</b> | No*  | Yes     | Yes     | Unknown | Colorado, USA                            | Adult flashing Lampyridae                                 |

1. UK Glow worm survey home page. <https://www.glowworms.org.uk/> (accessed 12 September 2023).
2. Glimwormenwerkgroep. Natuurpunt. <https://www.natuurpunt.be/afdelingen/glimwormenwerkgroep> (accessed 12 September 2023).
3. Nature Conservation Society of Japan. モニタリング1000里地調査：マニュアル・調査票 [Monitoring 1000 Satochi Survey: Manual/Survey Form]. 日本自然保護協会オフィシャルサイト [Japan Nature Conservation Association official website]. <https://www.nacsj.or.jp/activities/guardians/moni1000/howto/> (accessed 24 August 2023).
4. Glow Up! Torino (2007) - Francesco Mariotti. <https://www.mariotti.ch/en/expositions/2007/glow/> (accessed 12 September 2023).
5. Firefly Watch. Mass Audubon. <https://www.massaudubon.org/programs-events/community-science/firefly-watch> (accessed 12 September 2023).

6. Guzmán Álvarez, J. R.; De Cock, R. *Gusanosdeluz* | *Luciérnagas. Esos bichitos mágicos*. <https://www.gusanosdeluz.com/> (accessed 2023-09-28).
7. *Fireflyers International*. iNaturalist. <https://www.inaturalist.org/projects/fireflyers-international> (accessed 28 September 2023).
8. Chow, A.; Pargas, R. P.; Voges, A.; Li, B.; Edmonson, D.; Edison, G.; Hull, J.; Chong, J.-H.; Lyons, R. *Final Report: Clemson University's Vanishing Firefly Project: Using a Mobile Phone App as Educational and Research Tools for Sustainability*; EPA Grant Number: SU835496; U.S. Environmental Protection Agency. [https://cfpub.epa.gov/ncer\\_abstracts/index.cfm](https://cfpub.epa.gov/ncer_abstracts/index.cfm) (accessed 22 August 2023).
9. *Western Firefly Project: A Community Science Initiative* | Natural History Museum of Utah. <https://nhmu.utah.edu/citizen-science/fireflies> (accessed 12 September 2023).
10. *Observatoire des vers luisants*. <http://www.asterella.eu/NEOKIPOS/formulaire0.php?pays=FRANCE&p=> (accessed 28 September 2023).
11. *Krešo Krijesnica - Spasimo svjetla našeg djetinjstva*. <https://www.facebook.com/kresokrijesnica> (accessed 29 September 2023).
12. West Virginia Division of Natural Resources. *Light Up West Virginia's State Parks*. ArcGIS StoryMaps. <https://storymaps.arcgis.com/stories/cc64f79fba9f41d2905aa6068ba13daa> (accessed 28 September 2023).
13. *Grup Cucadellum (ICHN) – Grup d'estudi dels lampírids de Catalunya*. <https://cucadellum.cat/> (accessed 12 September 2023).
14. [Returning the light to the fireflies] מחזירים את האור לגחליליות. החברה להגנת הטבע. <https://www.teva.org.il/citizen-science/3391> (accessed 12 September 2023).
15. *Hong Kong Firefly Survey Team* 香港螢火蟲調查隊. HK Firefly Survey Team 香港螢火蟲調查隊. <http://hkentsoc.org/hongkongfireflysurvey/hkentsoc.org/index.html> (accessed 28 September 2023).
16. *Atlanta Firefly Project*. Atlanta Firefly Project. <https://www.atlantafireflyproject.org> (accessed 30 October 2023).
17. Rana, N.; Rayal, R.; Uniyal, V. P. Firefly Survey: Adopting Citizen Science Approach to Record the Status of Flashing Beetles. *Journal of Threatened Taxa* **2022**, 14 (10), 22016–22020. <https://doi.org/10.11609/jott.7939.14.10.22016-22020>.
18. *Magical Mysteries at Bukit Kiara*. Friends Of Bukit Kiara. <https://www.fobk.org/fireflies/magical-mysteries-at-bukit-kiara/> (accessed 12 September 2023).
19. *Fireflies of Australia* | Facebook. <https://www.facebook.com/groups/firefliesofaustralia/> (accessed 28 September 2023).
20. *Firefly Atlas* | Home. Firefly Atlas. <https://www.fireflyatlas.org/> (accessed 28 September 2023).
21. *Constructing a Colorado Firefly Flash Pattern Dataset*. SciStarter. <https://scistarter.org/constructing-a-colorado-firefly-flash-pattern-data> (accessed 2023-09-28).
